# Supplementary material for: Wireless Sensor and Actor Network - Security Analysis
Source: Royal Society of Chemistry journal article supplement (doi:10.1039/c2lc40213k), 2014-01-01
Supplement: c2lc40213k.pdf [file c2lc40213k.pdf]

### Supplementary data

A

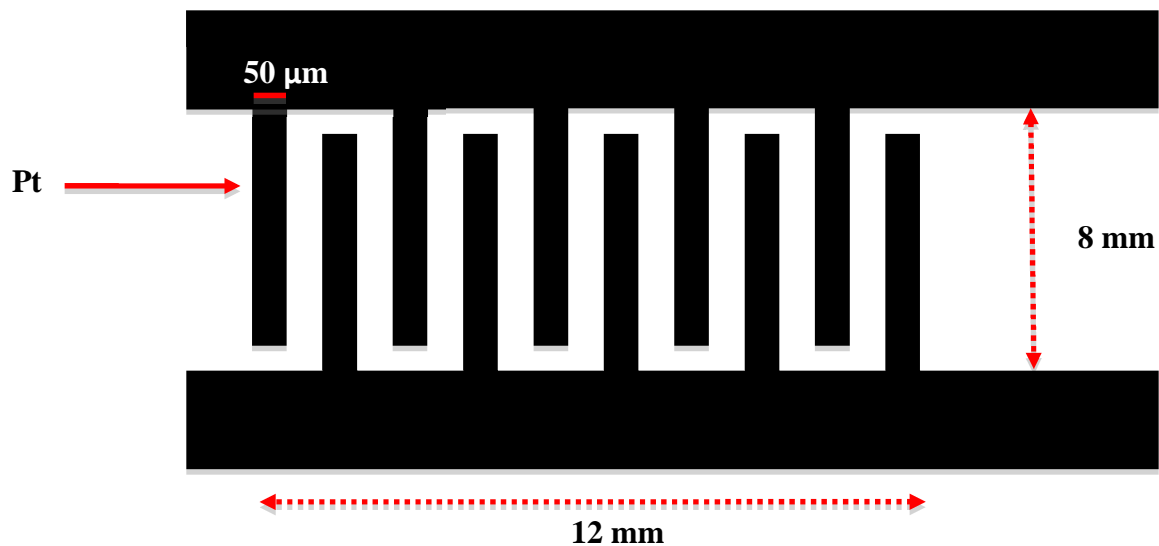

B

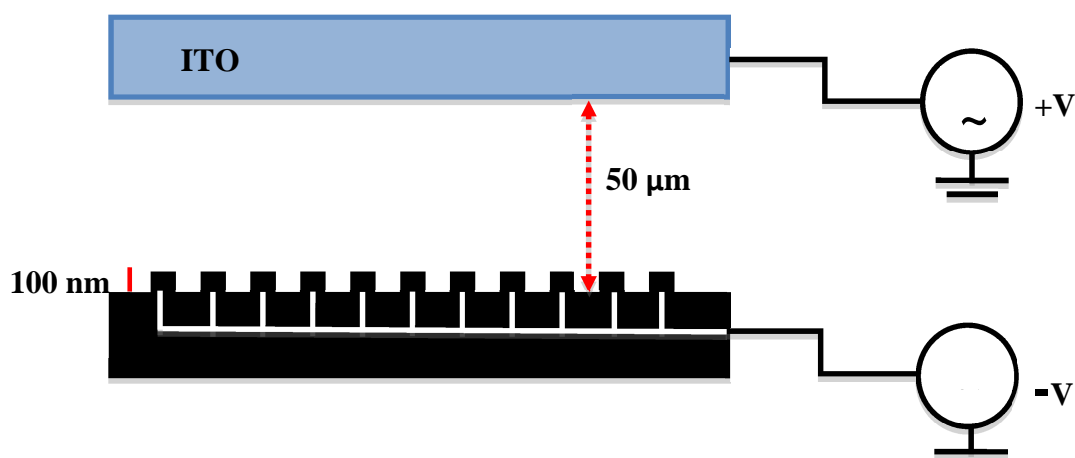

Figure S1. Top view of the Pt-IDA electrode on the glass slide with  $50\text{-}\mu\text{m}$  and  $50\text{-}\mu\text{m}$  gap distance (A). Side view of the design for the dielectrophoresis (DEP)-based cell patterning experiments in which an indium tin oxide (ITO) electrode was used as the top electrode and a Pt-IDA electrode with a thickness of  $100\ \text{nm}$  was used as bottom electrode (B).

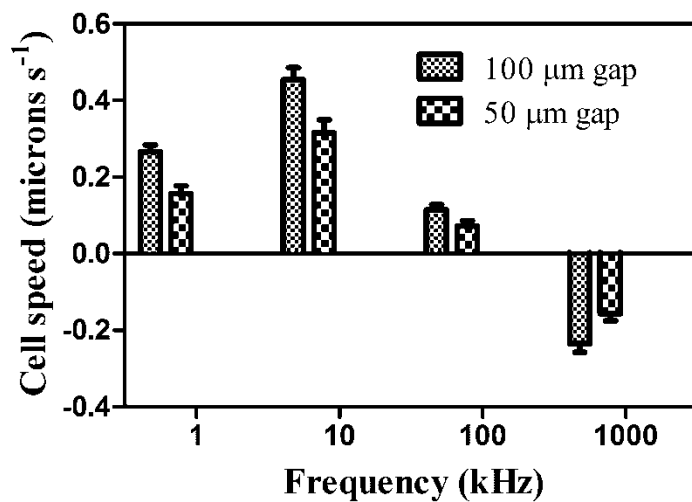

Figure S2. Measured speed of cells in the sucrose buffer and 5% GelMA prepolymer manipulated by DEP forces inside the chamber with a 50- $\mu\text{m}$  electrode–50- $\mu\text{m}$  gap and 50- $\mu\text{m}$  electrode–100- $\mu\text{m}$  gap Pt-IDA design. When cells were stimulated by 1, 10, and 100 kHz, negative DEP behavior was observed, while the cells manipulated by 1 MHz presented positive DEP.

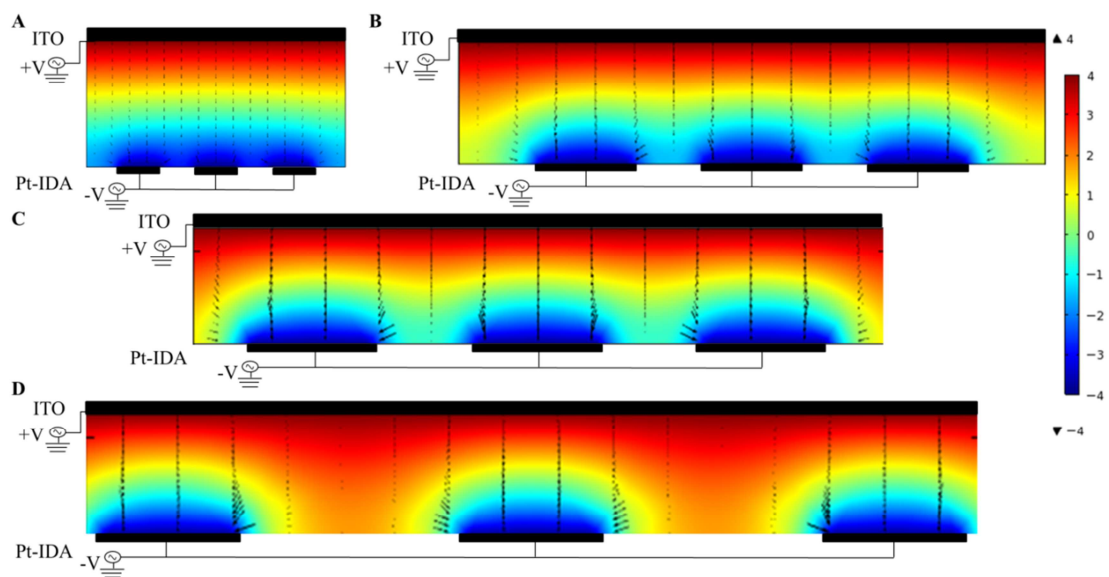

Figure S3. Cross-sectional view of the numerically calculated electric field (V/m) formed in the patterning device obtained by the COMSOL Multiphysics 4.2 software package. Arrows show current density. Upper and lower black bars show the ITO electrode and the Pt-IDA electrode, respectively, with different designs, namely, (A) 15- $\mu\text{m}$ -width electrode-15- $\mu\text{m}$  gap, (B) 50- $\mu\text{m}$ -width electrode-35- $\mu\text{m}$  gap, (C) 50- $\mu\text{m}$ -width electrode-50- $\mu\text{m}$  gap, and (D) 50- $\mu\text{m}$ -width electrode-100- $\mu\text{m}$  gap.

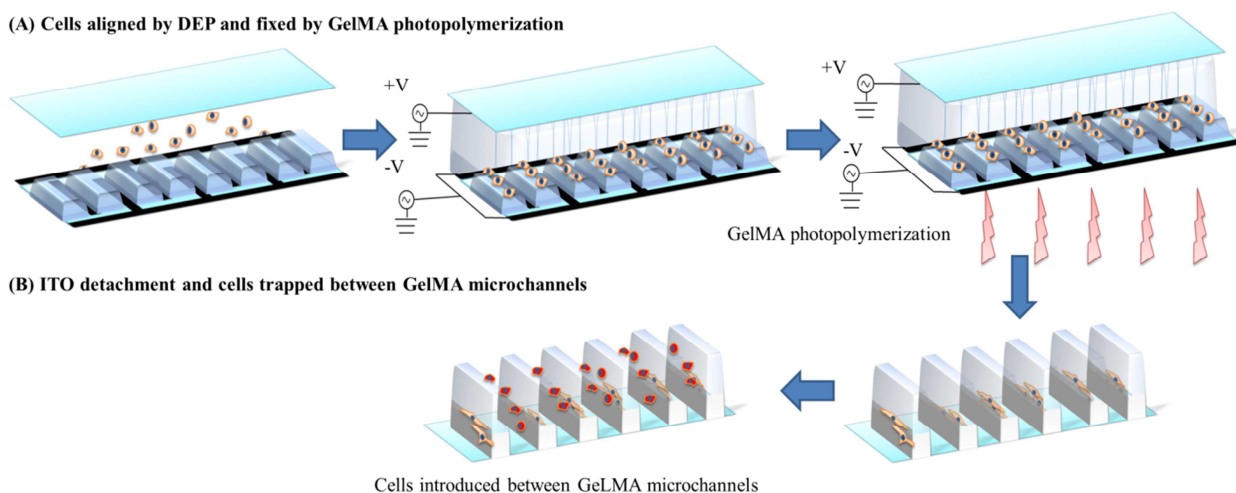

Figure S4. Schematic representation of the process for the co-culture of HUVEC and C2C12 cells. The first cell type, in 5% gelatin methacrylate (GelMA) prepolymer, was injected into the device, aligned by n-DEP, and UV light was irradiated from the underside to cross-link the GelMA prepolymer (A). The ITO electrode was detached, unpolymerized prepolymer was washed out by PBS buffer, and the second cell type suspended in the culture medium was introduced. After 15 min of incubation, the device was gently washed out again with PBS to trap the second cell type in the gap regions between GelMA polymers (B).

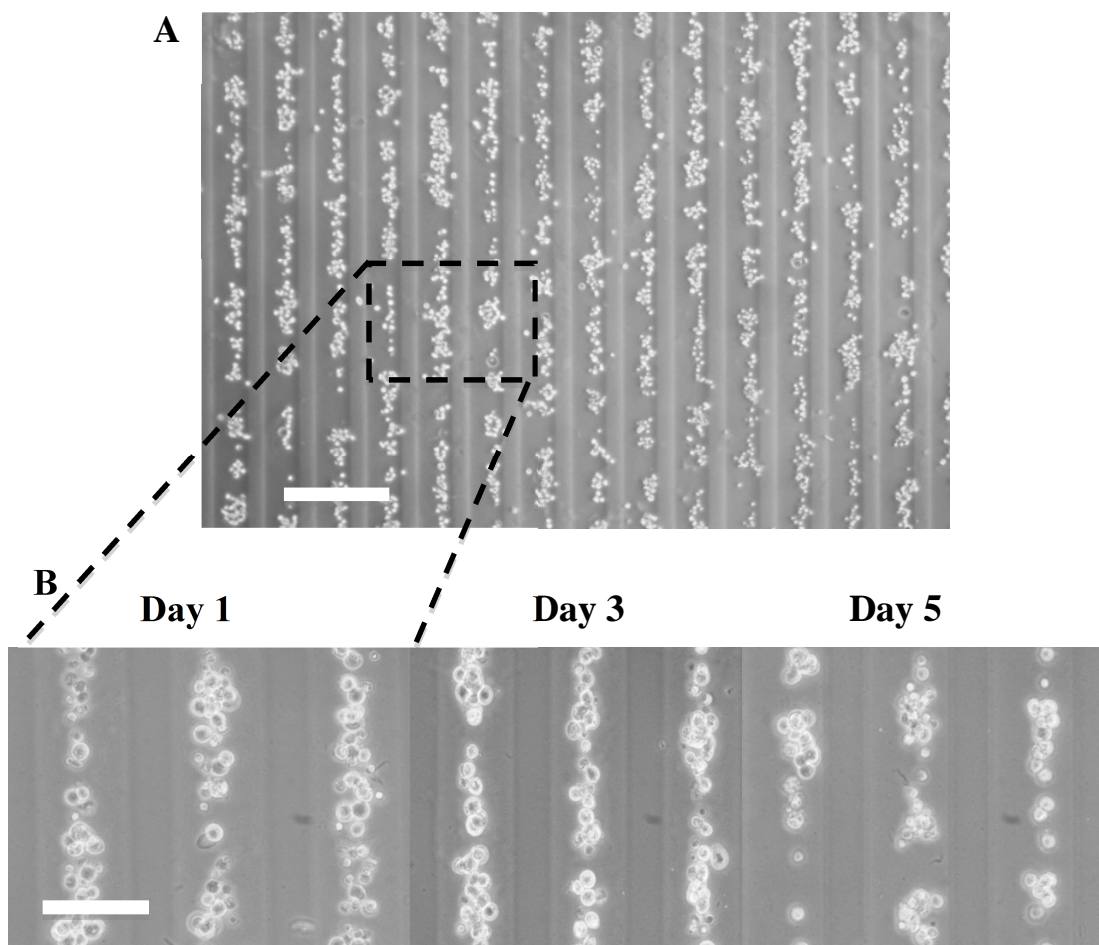

Figure S5. Picture of aligned C2C12 muscle cells within 20% polyethylene glycol (PEG) hydrogel as obtained by the dielectrophoresis (DEP) technique using 50  $\mu\text{m}$  electrode-100  $\mu\text{m}$  gap device (A). Phase contrast images of the aligned C2C12 muscle cells within 20% PEG hydrogel at different culture times (B). Scale bar shows 300  $\mu\text{m}$  and 100  $\mu\text{m}$  in A and B, respectively.

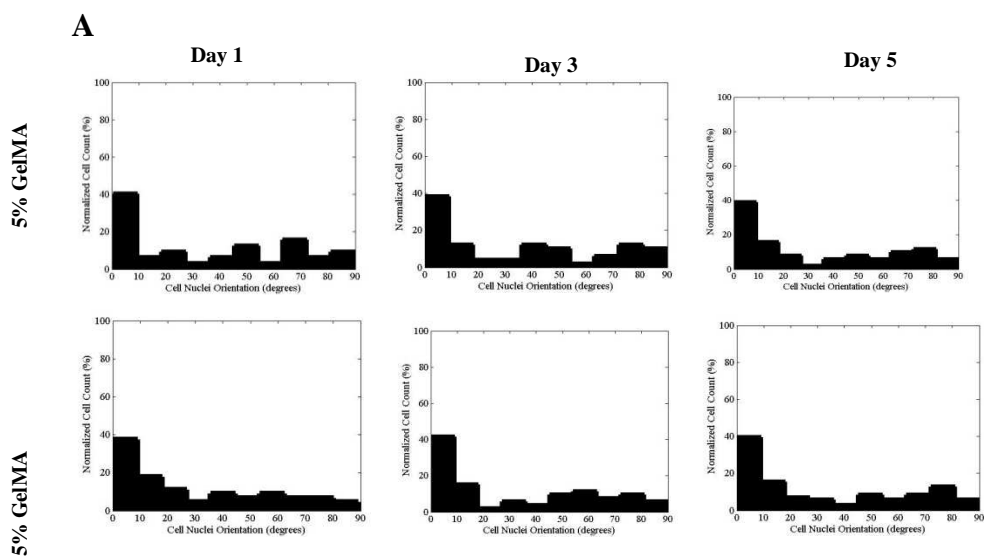

**B**

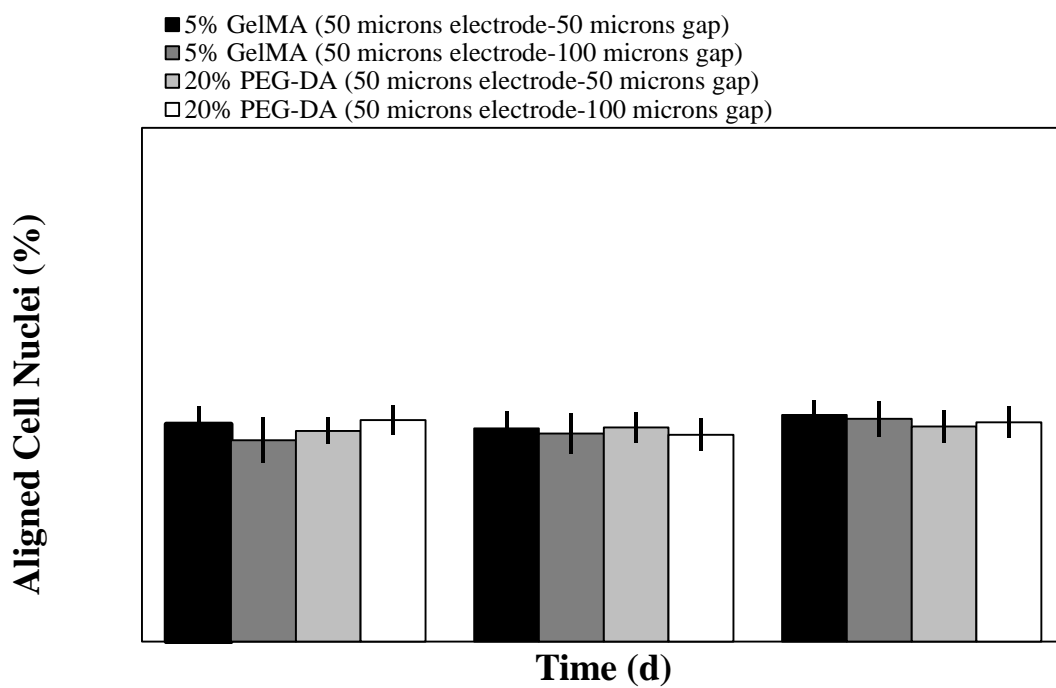

C

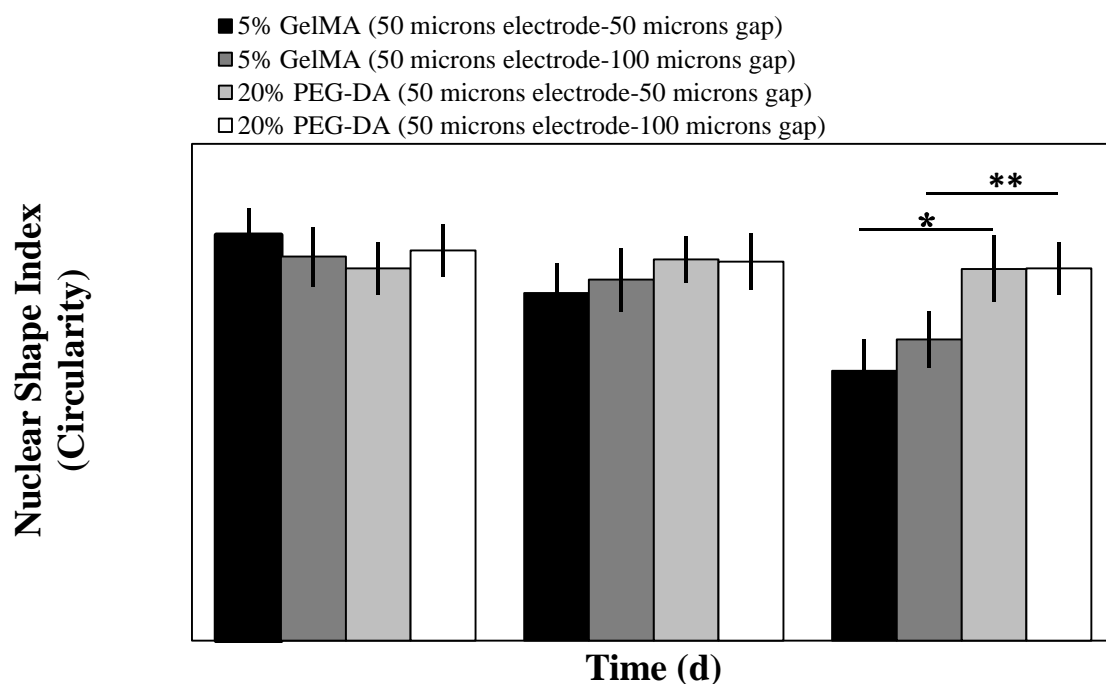

Figure S6. Evaluation of cell alignment and elongation for the patterned HUVEC cells encapsulated in 5% gelatin methacrylate (GelMA) and 20% polyethylene glycol (PEG) using 50- $\mu\text{m}$  electrode–50- $\mu\text{m}$  gap and 50- $\mu\text{m}$  electrode–100- $\mu\text{m}$  gap devices. Representative histograms of the relative alignment in 10 degree increments show highly aligned HUVEC cells in the GelMA hydrogel (A). Both hydrogels demonstrated the ability to keep the aligned cells for 5 days of culture (B). However, the circularity reduction that has a direct relationship with the cell proliferation remained almost constant for PEG and decreased for the GelMA hydrogel (C) (\* $p < 0.01$ , \*\* $p < 0.05$ ).

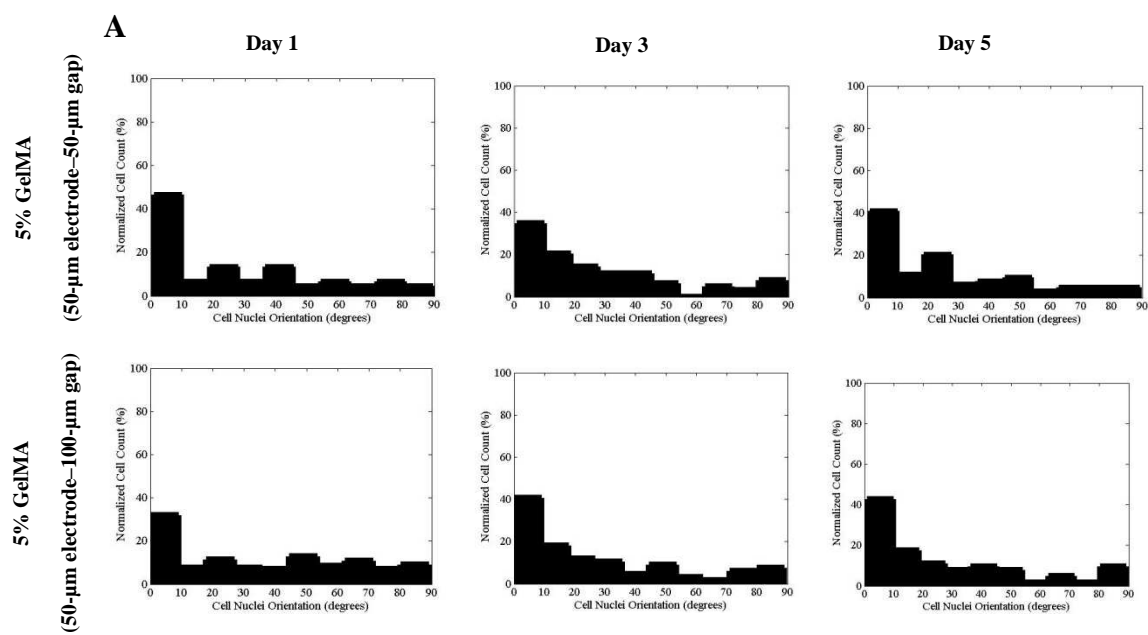

**B**

- 5% GelMA (50 microns electrode-50 microns gap)
- 5% GelMA (50 microns electrode-100 microns gap)
- 20% PEG-DA (50 microns electrode-50 microns gap)
- 20% PEG-DA (50 microns electrode-100 microns gap)

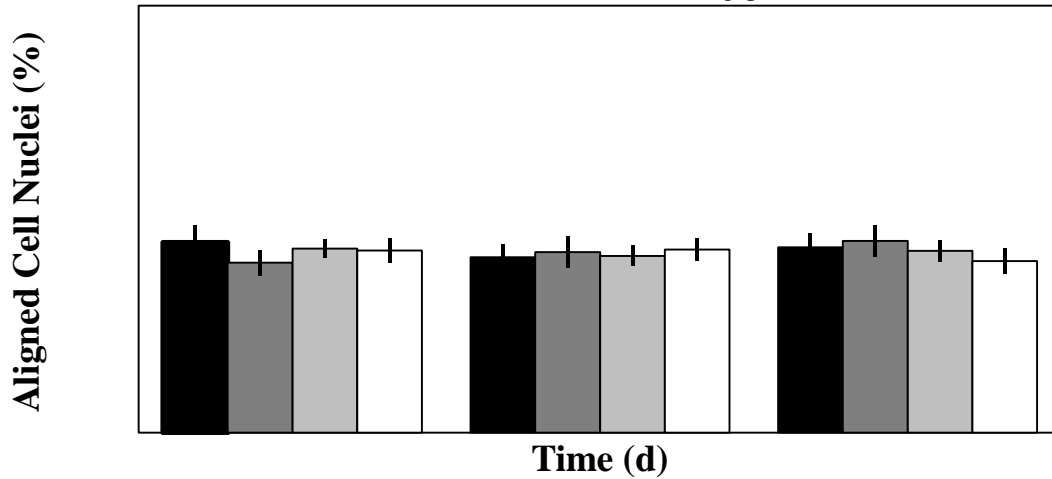



C

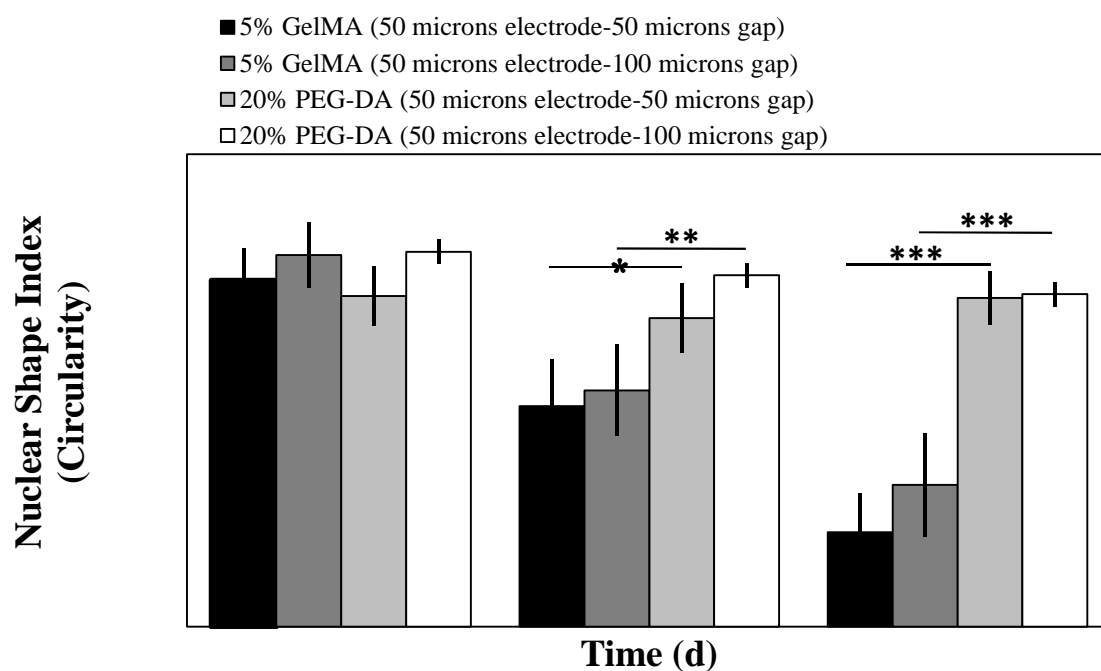

Figure S7. Assessment of cell alignment and elongation for the patterned C2C12 cells encapsulated in 5% gelatin methacrylate (GelMA) and 20% polyethylene glycol (PEG) using 50- $\mu\text{m}$  electrode–50- $\mu\text{m}$  gap and 50- $\mu\text{m}$  electrode–100- $\mu\text{m}$  gap devices. Representative histograms of the relative alignment in 10 degree increments show highly aligned C2C12 cells in the GelMA hydrogel (A). Both hydrogels demonstrated the ability to preserve the aligned cells for 5 days of culture (B). However, the circularity reduction, which has a direct relationship with cell proliferation, remained almost constant for the PEG and decreased for the GelMA hydrogel (C) (\*p < 0.05, \*\*p < 0.01, \*\*\*p < 0.001).

Table S1. Characteristics of the media used in the present negative-DEP experiments

| <b>Parameters</b>                  | <b>Mineral water</b> | <b>PBS buffer</b> | <b>10 times diluted PBS</b> | <b>HEPES<sup>(a)</sup> buffer</b> | <b>DMEM</b> | <b>Sucrose buffer</b> |
|------------------------------------|----------------------|-------------------|-----------------------------|-----------------------------------|-------------|-----------------------|
| pH                                 | 7                    | 7.5               | 7.5                         | 5.4                               | 7.2         | 7.2                   |
| Conductivity (mS m <sup>-1</sup> ) | -                    | 1500              | 150                         | 10                                | 1856        | 8                     |
| Cell viability after 1 h (%)       | <10                  | 62                | 44                          | 50                                | 95          | 88                    |

<sup>(a)</sup> HEPES buffer is composed of 0.01 M HEPES, 0.25 M sucrose, 0.06 M D-glucose, and  $1 \times 10^{-3}$  M CaCl<sub>2</sub>.
